# Supplementary material
Source: PubMed Central journal article supplement (PMC8105489)

## Supplementary material

### **Biopolymers production by halotolerant bacteria isolated from Caatinga Biome**

Maria Paula Parada-Pinilla<sup>1</sup>, Maria Alejandra Ferreira<sup>1</sup>, Juan Camilo Roncallo<sup>1</sup>, Suikinai Nobre Santos<sup>2</sup>, Itamar Soares de Melo<sup>2</sup>, Alexia Nathália Brígido Assef<sup>3</sup>, Diego Veras Wilke<sup>3</sup>, Luiziana Ferreira da Silva<sup>1</sup>, Leandro Maza Garrido<sup>1</sup>, Wellington Luiz de Araújo<sup>4</sup> and Gabriel Padilla<sup>1</sup>

<sup>1</sup> Bioproducts Laboratory, Institute of Biomedical Sciences, University of São Paulo, São Paulo, Brazil

<sup>2</sup> Environmental Microbiology Laboratory, Brazilian Agricultural Research Corporation (Embrapa), São Paulo, Brazil

<sup>3</sup> Laboratory of Bioprospecting and Marine Biotechnology, Federal University of Ceará, Fortaleza, Brazil

<sup>4</sup> Molecular Biology and Microbial Ecology Laboratory, Institute of Biomedical Sciences, University of São Paulo, São Paulo, Brazil

Corresponding author: Gabriel Padilla, [gpadilla@icb.usp.br](mailto:gpadilla@icb.usp.br)

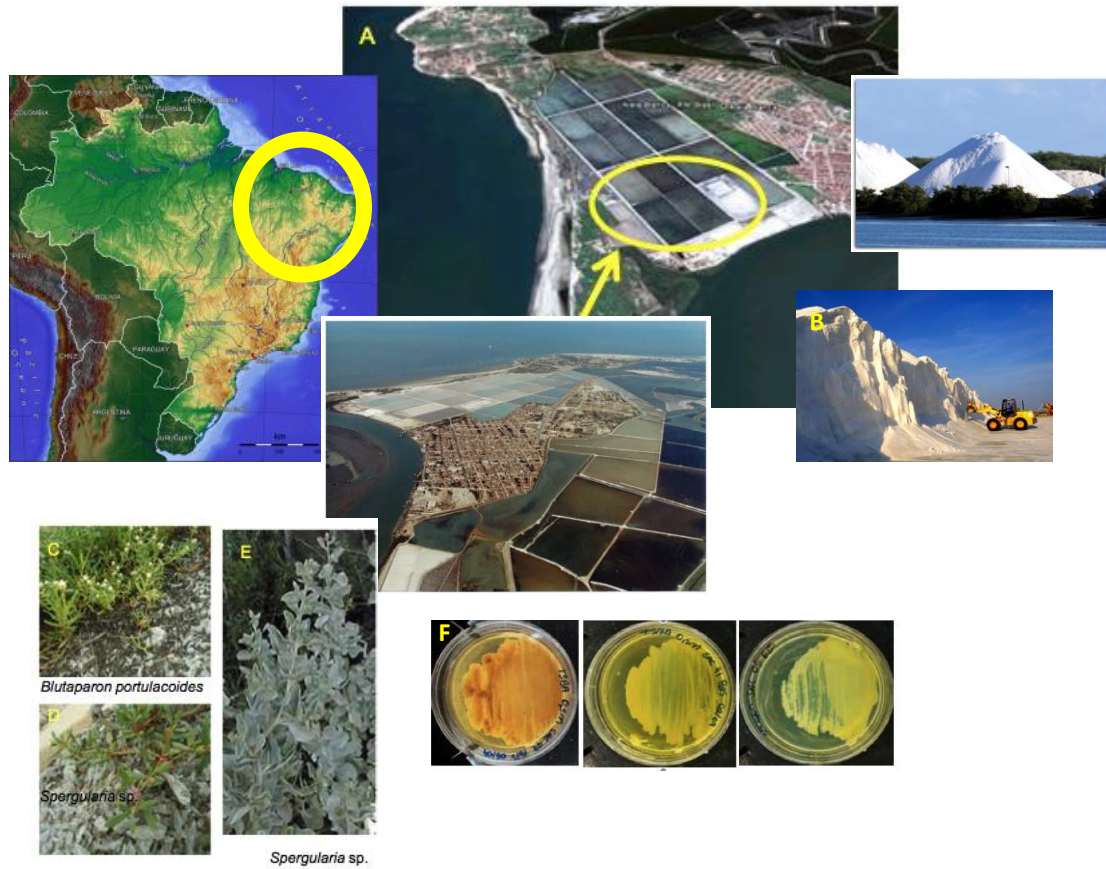

**Figure S1.** Caatinga biome, Mossoró district (A), Rio Grande do Norte state, near Areia Branca saltworks (B), coordinates 4 57'22''S- 37 08'13''W. (C) Plant of native species *Blutaparon portulacoides*, popularly known as Succulent. (D-E) *Spergularia* sp., known as Pirristio. (F) Halotolerant isolates. Images courtesy of the Environmental Microbiology Laboratory (Embrapa)

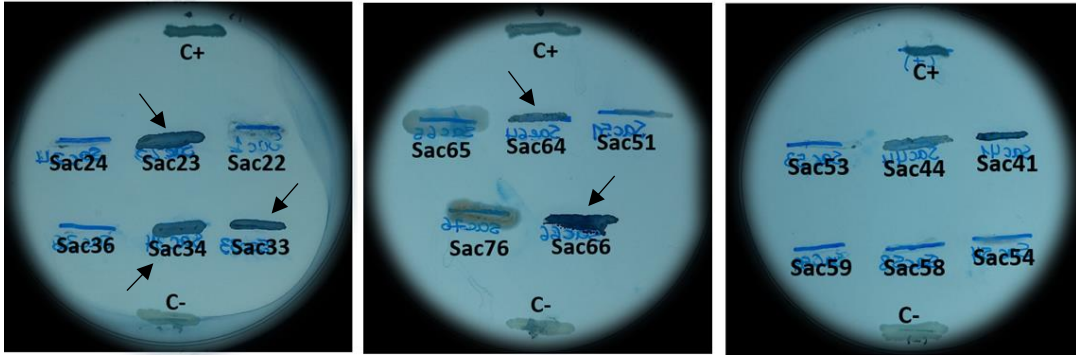

**Figure 1 S2.** Screening of polyhydroxyalkanoates-producing bacteria by Sudan Black B staining method. Mineral salts solid media supplemented with 1% glucose. Incubation time 72 hours. Positive control (C+) *Pseudomonas* sp. LFM 046, negative control (C-) *Pseudomonas* sp. LFM 461. The arrows indicate selected isolates as potential PHA producers.

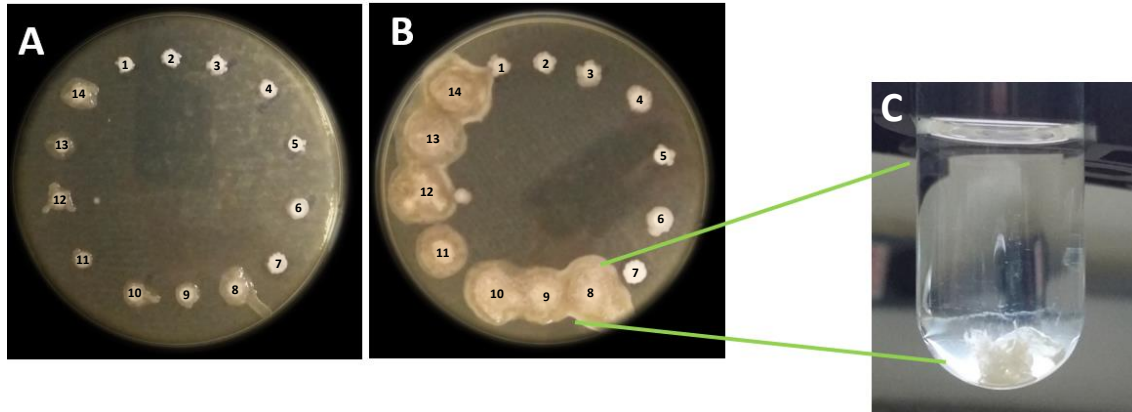

**Figure S3.** Screening of exopolysaccharides-producing bacteria. Translucent colonies, potentially producing EPS (A and B). Confirmation of EPS production by mixture of colonies in ethanol (C).

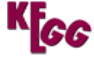

Bacillus filamentosus: BEH\_04720

Help

|            |                                                                                                                                                                                                                                                                                                                                                                                                                                                                                                                                                                                                                                                                                                                                                                                                                                                                                                                                                                                                                                                                                                                                                                                                                         |
|------------|-------------------------------------------------------------------------------------------------------------------------------------------------------------------------------------------------------------------------------------------------------------------------------------------------------------------------------------------------------------------------------------------------------------------------------------------------------------------------------------------------------------------------------------------------------------------------------------------------------------------------------------------------------------------------------------------------------------------------------------------------------------------------------------------------------------------------------------------------------------------------------------------------------------------------------------------------------------------------------------------------------------------------------------------------------------------------------------------------------------------------------------------------------------------------------------------------------------------------|
| Entry      | BEH_04720 CDS T03983                                                                                                                                                                                                                                                                                                                                                                                                                                                                                                                                                                                                                                                                                                                                                                                                                                                                                                                                                                                                                                                                                                                                                                                                    |
| Definition | (GenBank) class III poly(R)-hydroxyalkanoic acid synthase subunit PhaC<br>KO K03821 polyhydroxyalkanoate synthase subunit PhaC [EC:2.3.1.-]                                                                                                                                                                                                                                                                                                                                                                                                                                                                                                                                                                                                                                                                                                                                                                                                                                                                                                                                                                                                                                                                             |
| Organism   | beo Bacillus filamentosus                                                                                                                                                                                                                                                                                                                                                                                                                                                                                                                                                                                                                                                                                                                                                                                                                                                                                                                                                                                                                                                                                                                                                                                               |
| Pathway    | beo00650 Butanoate metabolism<br>beo01100 Metabolic pathways                                                                                                                                                                                                                                                                                                                                                                                                                                                                                                                                                                                                                                                                                                                                                                                                                                                                                                                                                                                                                                                                                                                                                            |
| Brite      | KEGG Orthology (KO) [BR:beo00001]<br>09100 Metabolism<br>09101 Carbohydrate metabolism<br>00650 Butanoate metabolism<br>BEH_04720<br>Enzymes [BR:beo01000]<br>2. Transferases<br>2.3 Acyltransferases<br>2.3.1 Transferring groups other than aminoacyl groups<br>2.3.1.-<br>BEH_04720<br><a href="#">BRITE hierarchy</a>                                                                                                                                                                                                                                                                                                                                                                                                                                                                                                                                                                                                                                                                                                                                                                                                                                                                                               |
| SSDB       | <a href="#">Ortholog</a> <a href="#">Paralog</a> <a href="#">Gene cluster</a> <a href="#">GFIT</a>                                                                                                                                                                                                                                                                                                                                                                                                                                                                                                                                                                                                                                                                                                                                                                                                                                                                                                                                                                                                                                                                                                                      |
| Motif      | Pfam: Abhydrolase_1 PhaC_N PHB_depo_C Hydrolase_4 DUF3141 DLH<br>Abhydrolase_5 DUF2048<br><a href="#">Motif</a>                                                                                                                                                                                                                                                                                                                                                                                                                                                                                                                                                                                                                                                                                                                                                                                                                                                                                                                                                                                                                                                                                                         |
| Other DBs  | NCBI-ProteinID: AK094970<br>UniProt: A0A0H4KN34                                                                                                                                                                                                                                                                                                                                                                                                                                                                                                                                                                                                                                                                                                                                                                                                                                                                                                                                                                                                                                                                                                                                                                         |
| LinkDB     | <a href="#">All DBs</a>                                                                                                                                                                                                                                                                                                                                                                                                                                                                                                                                                                                                                                                                                                                                                                                                                                                                                                                                                                                                                                                                                                                                                                                                 |
| Position   | 949233..950294<br><a href="#">Genome map</a>                                                                                                                                                                                                                                                                                                                                                                                                                                                                                                                                                                                                                                                                                                                                                                                                                                                                                                                                                                                                                                                                                                                                                                            |
| AA seq     | 353 aa <a href="#">AA seq</a> <a href="#">DB search</a><br>MEKLLATMPKEYKHSARRFKRAVEILTTEPEPEVGLTPKETIWKKNKAKLYRVVPKQETT<br>HRTPILMVYALINKPYILDLTGKNSLVEYLLDRGFDVYLLDWGTPGLEDDQMKLDDYILD<br>YIPRAVKKVLRTSGASDLSILGYCMGGTMTSIFASLHDDLPIKNLIFMTSPFDFSETGLY<br>GVFLDERYFNLDKVVDTLGNIPDMIDFGNKMLKPIITNFYGPYVTLMDRSENQRFVESWK<br>LMQKIVVGGGIPFPGEAYRQWIRDFYQQNLIKGELTVRGRKVDLSKIKASVLNIAADRDH<br>IAMPQQVESLMNVISSKDKEFKLLNTGHVSVVFGPKAVKETYPICIGDWLVKRS                                                                                                                                                                                                                                                                                                                                                                                                                                                                                                                                                                                                                                                                                                                                                                       |
| NT seq     | 1062 nt <a href="#">NT seq</a> +upstream 0 nt +downstream 0 nt<br>atggaaaaattgttagctacgatgccgaaggagtataaacattctgctagacgctttaa<br>cgggctgtggaattttaacaacagaaccgagcctgaagtagggttaactcctaaggag<br>accatttggaaaaagaataaagcaaaactttatagatatgtccaaaaacaagaaactact<br>catcgtacacctatcttaattggtatagctcttatacaataaacgtatattcttgattg<br>acaaaggggaacagctctttagaataatcttcttgatcgcggattgacgtgatctatta<br>gattggggcactcctggcctgaagaccaagatatgaagcctgatgattatattcttagac<br>tacattccaagagcagtgaaaaaagtgttgctacgtcaggagctagtgatttgcctac<br>ttaggatattgtatgggtggaacgatgacgtctatatttgcctctctacatgatgattta<br>ccaattaagaaccttattttatgactagtccttttgatttctcagaacaggactttat<br>ggagtattcttagatgaacgttactttaacttgataaagttagtgatacacttggcaat<br>attcctcctgatattgatttgggaataagatgcttaaacgattacgaacttctat<br>ggtccatacgtaacgcttatggatcggtcagaaaaatcagcgttttggtgaaagctggaaa<br>ctgatgcagaagtggtaggagatggattccattcccagggtgaagcttatcgtcagtg<br>attcgcgattttatcaacaaaaaagctaatacaaggggaactcactgtaagaggtcga<br>aaagttagacttctaaaattaagcaagcgttttaaatattgcccagatcgagatcat<br>attgcaatgccgcagcaagtagaatcattaatgaacgttatttccagcaaggacaagaa<br>tttaagcttctaaatacagggcatgtttcagttgtatttggacaaaaagctgtaaaggaa<br>acatatccttgacattggagactggttagtgaaacgttcgtaa |

Figure S4. Identification of phaC gene subunit in the genome of the Bacillus filamentosus hbe603 strain using the KEEG database.

## BLASTP Search Result

Database: genes

Protein sequence database entries related to beo:BEH\_04720 - 500 hits

Show alignment

| Entry                                                                                               | K number | bits | E-val |
|-----------------------------------------------------------------------------------------------------|----------|------|-------|
| <input checked="" type="checkbox"/> beo:BEH_04720 class III poly(R)-hydroxyalkanoic acid synthas... | K03821   | 727  | 0.0   |
| <input checked="" type="checkbox"/> bfx:BC359_14865 class III poly(R)-hydroxyalkanoic acid synth... | K03821   | 629  | 0.0   |
| <input checked="" type="checkbox"/> bmh:BMWSH_4007 phaC; PHA synthase PhaC                          | K03821   | 624  | 0.0   |
| <input checked="" type="checkbox"/> bmd:BMD_1216 phaC; polyhydroxyalkanoic acid synthase, PhaC s... | K03821   | 624  | 0.0   |
| <input checked="" type="checkbox"/> bmq:BMQ_1231 phaC; polyhydroxyalkanoic acid synthase, PhaC s... | K03821   | 624  | 0.0   |
| <input checked="" type="checkbox"/> bmeg:BG04_3531 phaC; poly(R)-hydroxyalkanoic acid synthase, ... | K03821   | 622  | 0.0   |
| <input checked="" type="checkbox"/> anx:ACH33_13635 poly(R)-hydroxyalkanoic acid synthase           | K03821   | 562  | 0.0   |
| <input checked="" type="checkbox"/> bmyo:BG05_4581 phaC; poly(R)-hydroxyalkanoic acid synthase, ... | K03821   | 558  | 0.0   |
| <input checked="" type="checkbox"/> asoc:CB4_03453 phbC; Poly-beta-hydroxybutyrate polymerase       | K03821   | 558  | 0.0   |
| <input checked="" type="checkbox"/> bww:bwei_3691 phaC; poly(R)-hydroxyalkanoic acid synthase, c... | K03821   | 557  | 0.0   |
| <input type="checkbox"/> bwe:BcerKBAB4_1232 poly(R)-hydroxyalkanoic acid synthase, cl...            | K03821   | 557  | 0.0   |
| <input type="checkbox"/> bwd:CT694_07075 class III poly(R)-hydroxyalkanoic acid synth...            | K03821   | 556  | 0.0   |
| <input type="checkbox"/> bcy:Bcer98_1044 poly(R)-hydroxyalkanoic acid synthase, class...            | K03821   | 555  | 0.0   |
| <input type="checkbox"/> bcb:BCB4264_A1369 phaC; poly(R)-hydroxyalkanoic acid synthas...            | K03821   | 555  | 0.0   |
| <input type="checkbox"/> bmyc:DJ92_3964 phaC; poly(R)-hydroxyalkanoic acid synthase, ...            | K03821   | 555  | 0.0   |
| <input type="checkbox"/> btn:BTF1_04290 poly(R)-hydroxyalkanoic acid synthase subunit...            | K03821   | 555  | 0.0   |
| <input type="checkbox"/> bti:BTG_14155 poly(R)-hydroxyalkanoic acid synthase subunit ...            | K03821   | 555  | 0.0   |
| <input type="checkbox"/> bcg:BCG9842_B3975 phaC; poly(R)-hydroxyalkanoic acid synthas...            | K03821   | 555  | 0.0   |
| <input type="checkbox"/> btw:BF38_2537 phaC; poly(R)-hydroxyalkanoic acid synthase, c...            | K03821   | 554  | 0.0   |
| <input type="checkbox"/> btf:YBT020_07235 poly(R)-hydroxyalkanoic acid synthase, clas...            | K03821   | 554  | 0.0   |
| <input type="checkbox"/> bt1:BALH_1180 poly(R)-hydroxyalkanoic acid synthase, class I...            | K03821   | 554  | 0.0   |
| <input type="checkbox"/> btk:BT9727_1208 phaC; poly(R)-hydroxyalkanoic acid synthase ...            | K03821   | 554  | 0.0   |

**Figure S5** Protein blast of the PhaC subunit found in *Bacillus filamentosus* hbe603 strain using the GenomeNet Bioinformatics Tools (Kyoto University Bioinformatics Center)

**Table S1**

Composition of the culture media used in the study for the production of biopolymers.

| Culture Media | Composition                                       | g/L   |
|---------------|---------------------------------------------------|-------|
| MSM           | Na <sub>2</sub> HPO <sub>4</sub>                  | 3.5   |
|               | KH <sub>2</sub> PO <sub>4</sub>                   | 1.5   |
|               | (NH <sub>4</sub> ) <sub>2</sub> SO <sub>4</sub>   | 1.0   |
|               | MgSO <sub>4</sub> ·7H <sub>2</sub> O              | 0.2   |
|               | CaCl <sub>2</sub> ·2H <sub>2</sub> O              | 0.01  |
|               | Fe (III)NH <sub>4</sub> -citrate                  | 0.06  |
|               | 1 ml trace elements solution<br>containing (g/l): |       |
|               | H <sub>3</sub> BO <sub>3</sub>                    | 0.3   |
|               | CoCl <sub>2</sub> ·6H <sub>2</sub> O              | 0.2   |
|               | ZnSO <sub>4</sub> ·7H <sub>2</sub> O              | 0.1   |
|               | MnCl <sub>2</sub> ·4H <sub>2</sub> O              | 0.03  |
|               | NaMoO <sub>4</sub> ·2H <sub>2</sub> O             | 0.03  |
|               | NiCl <sub>2</sub> ·6H <sub>2</sub> O              | 0.02  |
|               | CuSO <sub>4</sub> ·5H <sub>2</sub> O              | 0.01  |
| EPS-M         | Saccharose                                        | 100   |
|               | Yeast extract                                     | 20    |
|               | K <sub>2</sub> HPO <sub>4</sub>                   | 15    |
|               | MgSO <sub>4</sub> ·7H <sub>2</sub> O              | 0.2   |
|               | MnSO <sub>4</sub>                                 | 0.015 |
|               | FeSO <sub>4</sub>                                 | 0.015 |
|               | CaCl <sub>2</sub> ·2H <sub>2</sub> O              | 0.03  |
|               | NaCl                                              | 0.015 |
| HA-M          | Saccharose                                        | 100   |
|               | Yeast extract                                     | 20    |
|               | K <sub>2</sub> HPO <sub>4</sub>                   | 15    |
|               | MgSO <sub>4</sub> ·7H <sub>2</sub> O              | 0.2   |
|               | MnSO <sub>4</sub>                                 | 0.015 |
|               | FeSO <sub>4</sub>                                 | 0.015 |
|               | CaCl <sub>2</sub> ·2H <sub>2</sub> O              | 0.03  |
|               | NaCl                                              | 0.015 |

**Table S2**

16S rRNA sequence analysis of the isolates from rhizosphere of a saline region, Areia Branca saltworks of the caatinga biome.

| Strain  | Number of nucleotides (bp) | Closed type strain (% similarity)                                     | Accession number |
|---------|----------------------------|-----------------------------------------------------------------------|------------------|
| Sac1*   | 1405                       | <i>Bacillus paralicheniformis</i> KJ-16 <sup>T</sup> (99,9)           | MT479139         |
| Sac7*   | 1408                       | <i>Bacillus paralicheniformis</i> KJ-16 <sup>T</sup> (99,8)           | MT479140         |
| Sac9*   | 1411                       | <i>Bacillus paralicheniformis</i> KJ-16 <sup>T</sup> (99,9)           | MT479141         |
| Sac33** | 1294                       | <i>Bacillus filamentosus</i> SGD-14 <sup>T</sup> (100)                | MT479148         |
| Sac34** | 1331                       | <i>Bacillus filamentosus</i> SGD-14 <sup>T</sup> (100)                | MT479149         |
| Sac36** | 1228                       | <i>Exiguobacterium aestuarii</i> TF-16 <sup>T</sup> (99,5)            | MT479150         |
| Sac41** | 1198                       | <i>Bacillus filamentosus</i> SGD-14 <sup>T</sup> (99,4)               | MT479153         |
| Sac44** | 1350                       | <i>Bacillus paralicheniformis</i> KJ-16 <sup>T</sup> (99,9)           | MT479154         |
| Sac54*  | 1259                       | <i>Curtobacterium oceanosedimentum</i> ATCC 31317 <sup>T</sup> (98,7) | MT479157         |
| Sac58** | 1209                       | <i>Curtobacterium citreum</i> DSM 20528 <sup>T</sup> (99,6)           | MT479158         |
| Sac64** | 1385                       | <i>Bacillus paralicheniformis</i> KJ-16 <sup>T</sup> (99,8)           | MT479160         |
| Sac65** | 1185                       | <i>Pseudomonas alcaliphila</i> JCM 10630 <sup>T</sup> (97,4)          | MT479161         |
| Sac66** | 1342                       | <i>Bacillus filamentosus</i> SGD-14 <sup>T</sup> (99,8)               | MT479162         |
| Sac76** | 1124                       | <i>Bacillus filamentosus</i> SGD-14 <sup>T</sup> (100)                | MT479163         |
| Sac10*  | 1141                       | <i>Bacillus salacetis</i> SKP7-4 <sup>T</sup> (99,3)                  | MT479142         |
| Sac16*  | 1187                       | <i>Bacillus paralicheniformis</i> KJ-16 <sup>T</sup> (99,9)           | MT479143         |
| Sac18*  | 1111                       | <i>Bacillus paralicheniformis</i> KJ-16 <sup>T</sup> (99,5)           | MT479144         |
| Sac22** | 1203                       | <i>Bacillus paralicheniformis</i> KJ-16 <sup>T</sup> (99,5)           | MT479145         |
| Sac23** | 1242                       | <i>Bacillus filamentosus</i> SGD-14 <sup>T</sup> (100)                | MT479146         |
| Sac24** | 1203                       | <i>Bacillus albus</i> N35-10-2 <sup>T</sup> (100)                     | MT479147         |
| Sac37** | 1177                       | <i>Curtobacterium citreum</i> DSM 20528 <sup>T</sup> (99,2)           | MT479151         |
| Sac38** | 1199                       | <i>Staphylococcus warneri</i> ATCC 27836 <sup>T</sup> (98,9)          | MT479152         |
| Sac45** | 1198                       | <i>Bacillus haynesii</i> NRRL B-41327 <sup>T</sup> (97,4)             | MT479155         |
| Sac51*  | 1124                       | <i>Bacillus paralicheniformis</i> KJ-16 <sup>T</sup> (99,7)           | MT479156         |
| Sac59** | 1203                       | <i>Staphylococcus warneri</i> ATCC 27836 <sup>T</sup> (100)           | MT479159         |

\* Strains isolated from the rhizosphere of *Spergularia* sp plant

\*\* Strains isolated from the rhizosphere of *Blutaparon portulacoides* plant



**Table S3**

NaCl tolerance profile of bacterial strains isolated from Caatinga Biome.

| Genus                  | Strains                                                                                                                   | Range for growth NaCl (M) |
|------------------------|---------------------------------------------------------------------------------------------------------------------------|---------------------------|
| <i>Bacillus</i>        | Sac1, Sac7, Sac9, Sac10, Sac16, Sac18, Sac22, Sac23, Sac24, Sac33, Sac34, Sac41, Sac44, Sac45, Sac51, Sac64, Sac66, Sac76 | 0.1-2.0                   |
| <i>Curtobacterium</i>  | Sac37, Sac54, Sac58                                                                                                       | 0.1-2.0                   |
| <i>Staphylococcus</i>  | Sac38, Sac59                                                                                                              | 0.1-2.0                   |
| <i>Pseudomonas</i>     | Sac65                                                                                                                     | 0.1-2.0                   |
| <i>Exiguobacterium</i> | Sac36                                                                                                                     | 0.1-1.0                   |

**Table S4**

P(3HB) production from different carbon sources and different concentrations of NaCl (M) by two *Bacillus filamentosus* strains. Average and standard deviation of triplicate cultivation after 72 h.

| Isolates | Carbon Source | NaCl (M) | CDW (g/l) | P(3HB) (% CDW) | P(3HB) (g/l) |
|----------|---------------|----------|-----------|----------------|--------------|
| Sac33    | Glucose       | 0        | 2.7±4.4   | 30.5±2.2       | 0.9±1.4      |
|          |               | 0.6      | 2.4±3.6   | 17.6±0.9       | 0.4±0.4      |
|          |               | 1.0      | 3.0±2.5   | 15.6±1.7       | 0.5±0.9      |
|          |               | 2.0      | 1.1±0.0   | 1.5±2.6        | 0.0±0.0      |
|          | Xylose        | 0        | 1.6±5.2   | 36.6±2.5       | 0.6±1.4      |
|          |               | 0.6      | 1.6±1.3   | 16.9±0.6       | 0.3±0.2      |
|          |               | 1.0      | 1.4±1.6   | 14.1±3.6       | 0.2±0.7      |
|          |               | 2.0      | 1.2±0.3   | 0.1±0.1        | 0.0±0.0      |
|          | Glycerol      | 0        | 1.8±1.8   | 21.7±4.6       | 0.4±0.4      |
|          |               | 0.6      | 2.3±2.9   | 18.5±2.8       | 0.4±0.2      |
|          |               | 1.0      | 2.1±4.4   | 17.0±0.4       | 0.4±0.6      |
|          |               | 2.0      | 1.6±2.3   | 0.0±0.0        | 0.0±0.0      |
| Sac34    | Glucose       | 0        | 3.1±0.4   | 27.7±2.7       | 0.8±0.9      |
|          |               | 0.6      | 3.6±2.1   | 21.7±1.2       | 0.8±0.3      |
|          |               | 1.0      | 4.2±1.2   | 8.7±1.2        | 0.4±0.6      |
|          |               | 2.0      | 2.1±1.6   | 0.0±0.0        | 0.0±0.0      |
|          | Xylose        | 0        | 2.0±1.8   | 27.0±2.0       | 0.5±0.4      |
|          |               | 0.6      | 2.4±2.0   | 21.1±1.9       | 0.5±0.2      |
|          |               | 1.0      | 2.1±0.1   | 14.2±1.4       | 0.3±0.2      |
|          |               | 2.0      | 0.7±2.4   | 0.0±0.0        | 0.0±0.0      |
|          | Glycerol      | 0        | 1.9±0.8   | 20.3±2.1       | 0.4±0.4      |
|          |               | 0.6      | 2.1±2.9   | 14.8±1.4       | 0.3±0.8      |
|          |               | 1.0      | 1.6±4.2   | 10.9±2.7       | 0.2±0.0      |
|          |               | 2.0      | 1.6±2.5   | 0.0±0.0        | 0.0±0.0      |

**Table S5**

Quantification of Hyaluronic Acid (HA) using Alcian blue staining reaction. Average and standard deviation of triplicate cultivation after 7 days.

| Code        | Strain                                                   | Optical Density <sub>(540nm)</sub> | HA (mg/L) |
|-------------|----------------------------------------------------------|------------------------------------|-----------|
| ATCC 39920* | <i>Streptococcus equi</i> subsp.<br><i>Zooepidemicus</i> | 0,171 ± 0,0                        | 640,6     |
| Sac1        | <i>Bacillus paralicheniformis</i>                        | 0,214 ± 0,0                        | 561,6     |
| Sac7        | <i>Bacillus paralicheniformis</i>                        | 0,300 ± 0,0                        | 420,0     |
| Sac9        | <i>Bacillus paralicheniformis</i>                        | 0,171 ± 0,0                        | 640,6     |
| Sac10       | <i>Bacillus salacetis</i>                                | 0,187 ± 0,0                        | 610,6     |
| Sac16       | <i>Bacillus paralicheniformis</i>                        | 0,783 ± 0,0                        | 34,2      |
| Sac18       | <i>Bacillus paralicheniformis</i>                        | 0,295 ± 0,0                        | 426,4     |
| Sac22       | <i>Bacillus paralicheniformis</i>                        | 0,301 ± 0,0                        | 418,5     |
| Sac23       | <i>Bacillus filamentosus</i>                             | 0,163 ± 0,0                        | 655,6     |
| Sac24       | <i>Bacillus albus</i>                                    | 0,266 ± 0,0                        | 472,6     |
| Sac33       | <i>Bacillus filamentosus</i>                             | 0,159 ± 0,0                        | 663,6     |
| Sac34       | <i>Bacillus filamentosus</i>                             | 0,177 ± 0,0                        | 628,9     |
| Sac36       | <i>Exiguobacterium aestuarii</i>                         | 0,190 ± 0,0                        | 603,5     |
| Sac37       | <i>Curtobacterium</i> sp.                                | 0,155 ± 0,0                        | 671,4     |
| Sac38       | <i>Staphylococcus</i> sp.                                | 0,191 ± 0,0                        | 601,6     |
| Sac41       | <i>Bacillus filamentosus</i>                             | 0,161 ± 0,0                        | 658,2     |
| Sac44       | <i>Bacillus paralicheniformis</i>                        | 0,233 ± 0,0                        | 527,0     |
| Sac45       | <i>Bacillus haynesii</i>                                 | 0,799 ± 0,0                        | 33,3      |
| Sac51       | <i>Bacillus paralicheniformis</i>                        | 0,805 ± 0,1                        | 33,1      |
| Sac54       | <i>Curtobacterium</i> sp.                                | 0,131 ± 0,0                        | 719,0     |
| Sac58       | <i>Curtobacterium citreum</i>                            | 0,163 ± 0,0                        | 655,9     |
| Sac59       | <i>Staphylococcus warneri</i>                            | 0,152 ± 0,0                        | 676,3     |
| Sac64       | <i>Bacillus paralicheniformis</i>                        | 0,173 ± 0,0                        | 636,8     |
| Sac65       | <i>Pseudomonas</i> sp.                                   | 0,206 ± 0,0                        | 575,9     |
| Sac66       | <i>Bacillus filamentosus</i>                             | 0,173 ± 0,0                        | 636,8     |
| Sac76       | <i>Bacillus filamentosus</i>                             | 0,311 ± 0,0                        | 402,8     |

\* Positive control

**Table S6**

Hyaluronic acid (HA) standard curve. Average and standard deviation of triplicate experiments.

| HA (mg/L) | Optical Density <sub>(540nm)</sub> |
|-----------|------------------------------------|
| 0         | 0,804 ± 0,0                        |
| 50        | 0,758 ± 0,1                        |
| 100       | 0,681 ± 0,0                        |
| 200       | 0,464 ± 0,0                        |
| 300       | 0,348 ± 0,0                        |
| 500       | 0,273 ± 0,0                        |

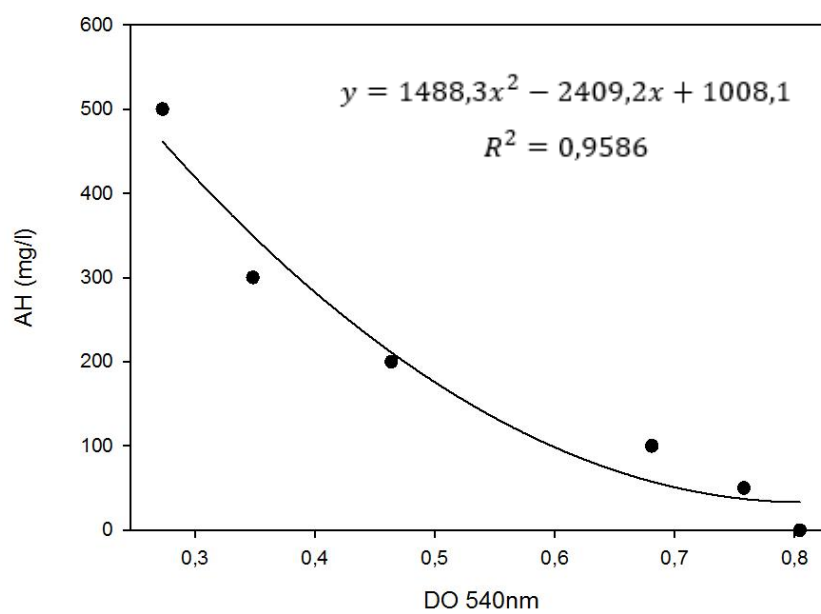

Supplement: 42770_2021_426_MOESM1_ESM.pdf [file 42770_2021_426_MOESM1_ESM.pdf]
